# Supplementary material for: Mechanisms of the RNA helicases DDX42 and DDX46 in human U2 snRNP assembly
Source: PubMed Central journal article supplement (PMC9935549; doi:10.1038/s41467-023-36489-x), 2023-02-17
Supplement: 41467_2023_36489_MOESM1_ESM.pdf [file 41467_2023_36489_MOESM1_ESM.pdf]

## Supplementary Information

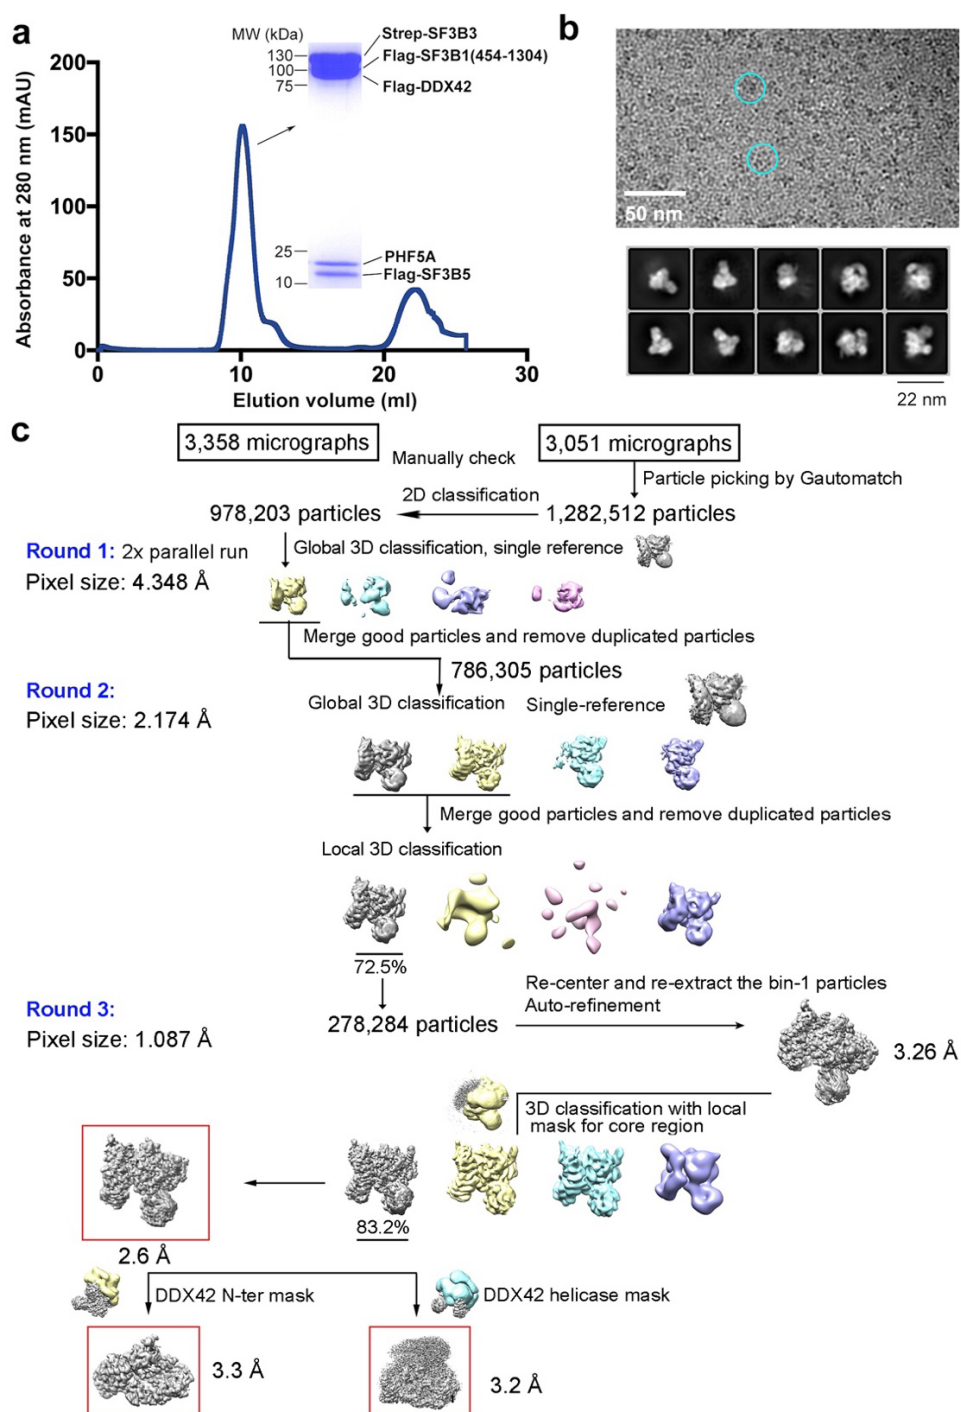

**Supplementary Figure 1. Purification and characterization of the DDX42-SF3b complex.** **a**, The purified DDX42-SF3b complex is eluted from gel filtration as a well-behaved peak. The peak fraction was visualized on an SDS-PAGE gel and stained by Coomassie blue. Experiments were repeated three times with similar results. **b**, A representative cryo-EM micrograph (upper panel) and representative 2D class averages (lower panel) of the human DDX42-SF3b complex. **c**, A flow chart diagram of cryo-EM data processing for the DDX42-SF3b core complex. Please refer to Methods for details.

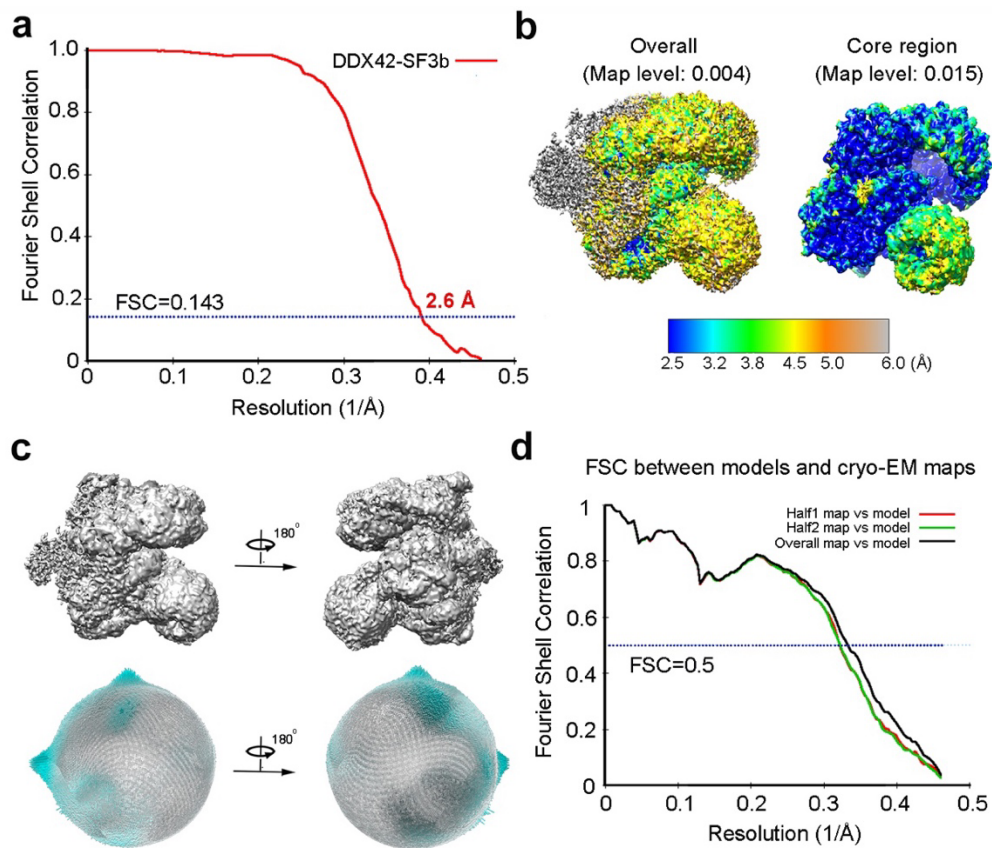

**Supplementary Figure 2. The cryo-EM reconstruction of the DDX42-SF3b complex at an average resolution of 2.6 Å.** **a**, The average resolution of the overall EM map is estimated to be 2.6 Å on the basis of the FSC criterion of 0.143. **b**, An overall view of the EM density maps. The overall EM map (left panel) and the EM map for the core region (right panel) are shown. The local resolutions are color-coded for different regions of the DDX42-SF3b core complex. **c**, Angular distribution of the particles used for the reconstruction. Each cylinder represents one view, and the height of the cylinder is proportional to the number of particles for that view. **d**, The Fourier-shell correlation (FSC) curves for cross-validation between the model and the cryo-EM map for the DDX42-SF3b complex. Shown here are the FSC curves between the final refined atomic model and the reconstruction from all particles (black), between the model refined in the reconstruction from only half of the particles and the reconstruction from that same half (red), and between that same model and the reconstruction from the other half of the particles (green).

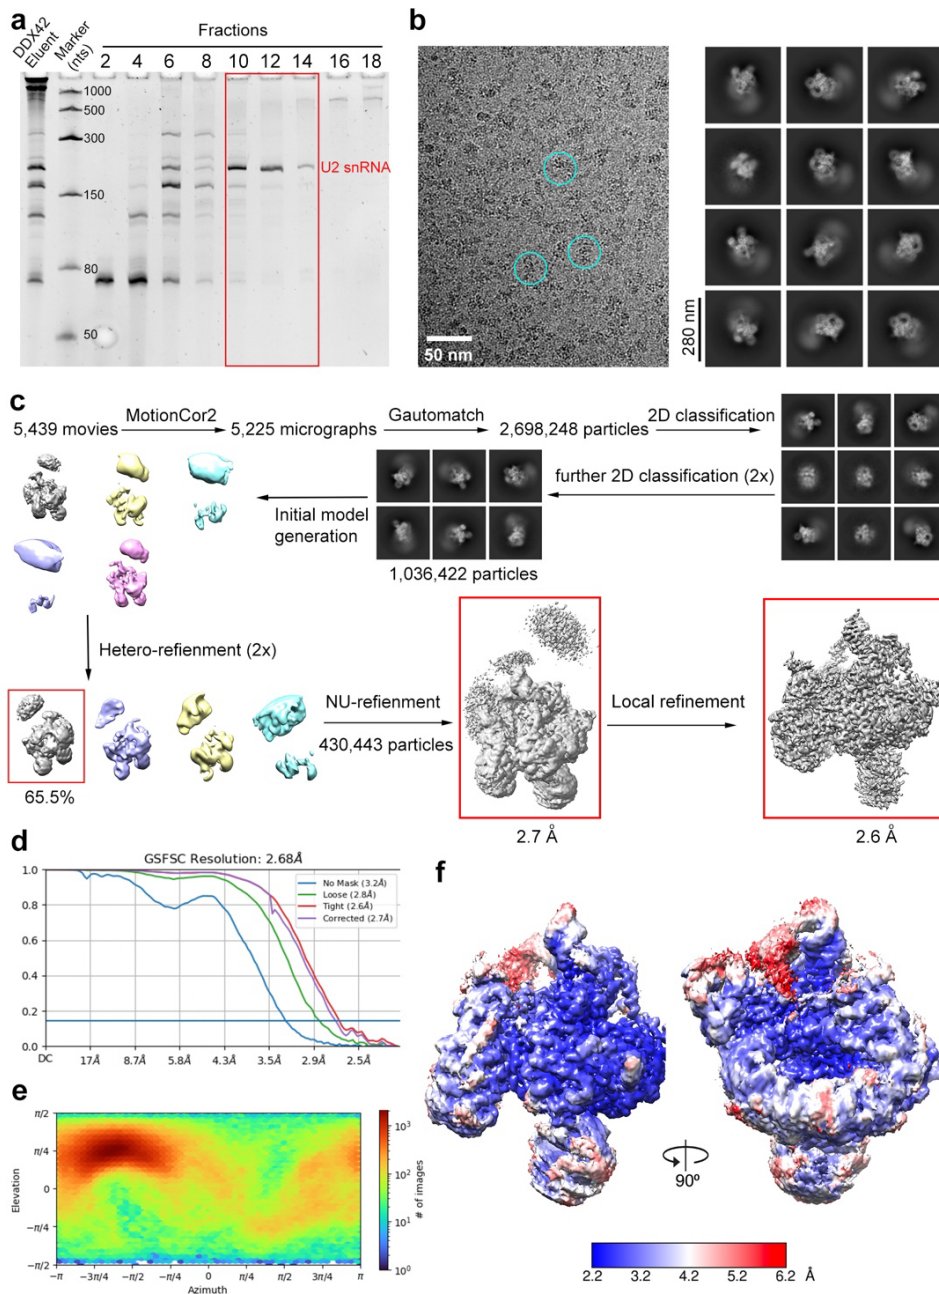

**Supplementary Figure 3. Purification and characterization of the DDX42-U2 complex.** **a**, The eluent of Flag-DDX42 was applied to glycerol gradient centrifugation. Fractions 10-14, mainly contains U2 snRNA as shown in this denaturing PAGE gel stained by SYBR-Gold, were collected for cryo-EM sample preparation. **b**, A representative cryo-EM micrograph (left panel) and representative 2D class averages (right panel) of the DDX42-U2 complex sample. **c**, A flow chart diagram of cryo-EM data processing for the DDX42-U2 complex. Please refer to Methods for details. **d**, The final reconstruction has an average resolution of 2.7 Å as determined by the FSC value of 0.143. **e**, Angular distribution of the particles in the final round of 3D refinement using CryoSPARC<sup>1</sup>. **f**, Two overall views of the EM density map. The local resolution of the EM density map is color-coded. The analyses in panels **a** and **b** were repeated for three times with similar results.



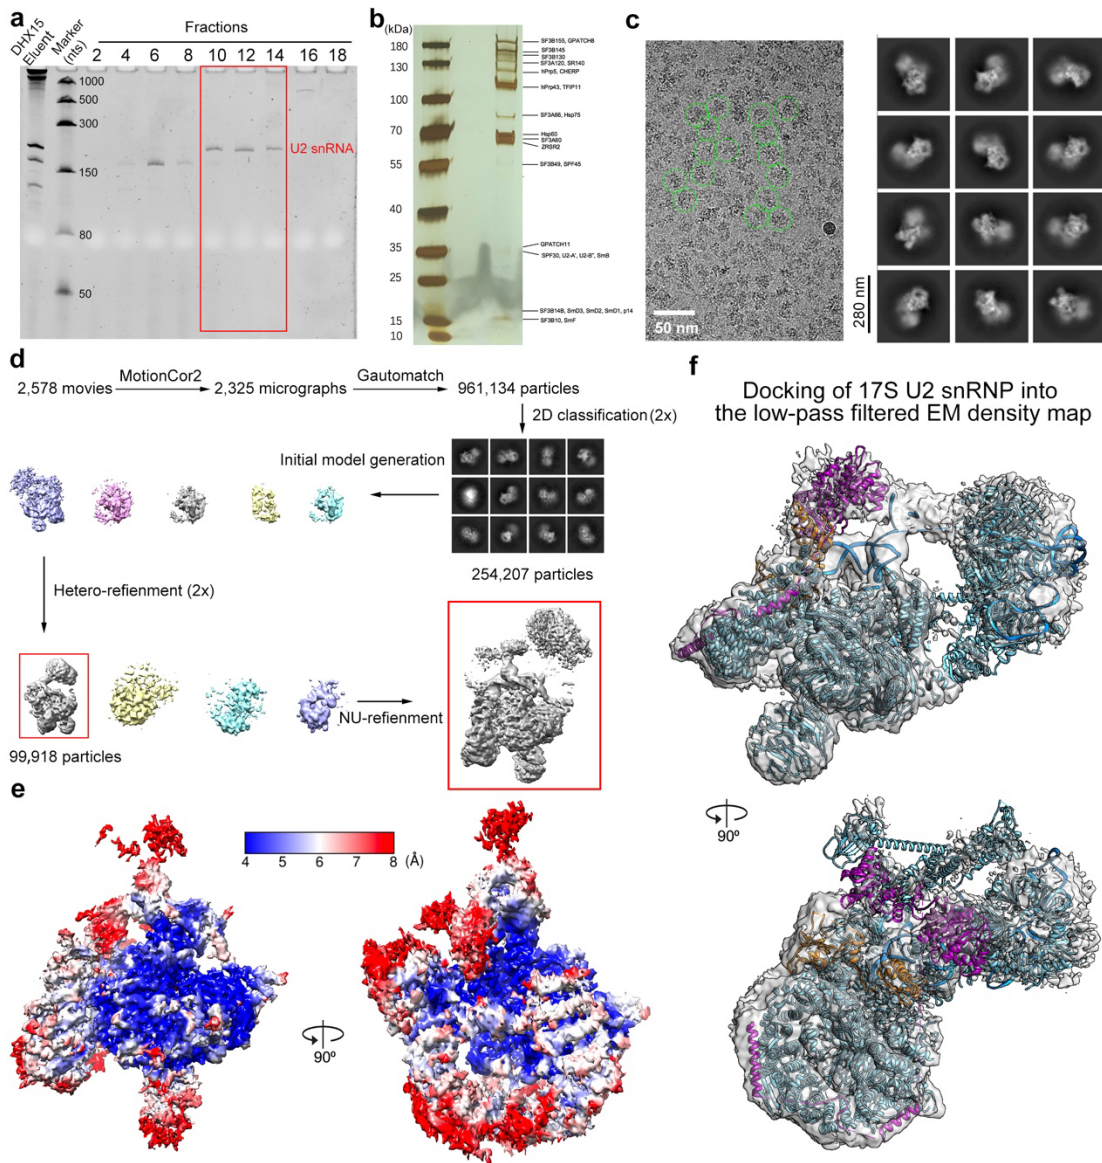

**Supplementary Figure 4. Purification and characterization of the DHX15-U2 complex.** **a**, The eluent of Flag-DHX15 was applied to glycerol gradient centrifugation. Fractions 10-14, mainly contains U2 snRNA, were collected for cryo-EM sample preparation. **b**, Analysis of the purified sample on a silver-stained SDS-PAGE gel. The protein components were identified by mass spectrometry. DHX15 and several G-patch proteins, such as TFIP11 and CHERP, were detected in the final sample. **c**, A representative cryo-EM micrograph (left panel) and representative 2D class averages (right panel) of the DHX15-U2 complex. **d**, A flow chart diagram of cryo-EM data processing for the DHX15-U2 complex. **e**, Two overall views of the EM density map. The local resolution of the EM density map is color-coded. **f**, Docking of the atomic model of 17S U2 snRNP<sup>2</sup> into a low-pass filtered EM map of the DHX15-U2 complex. The analyses in panels **a-c** were repeated for three times with similar results.



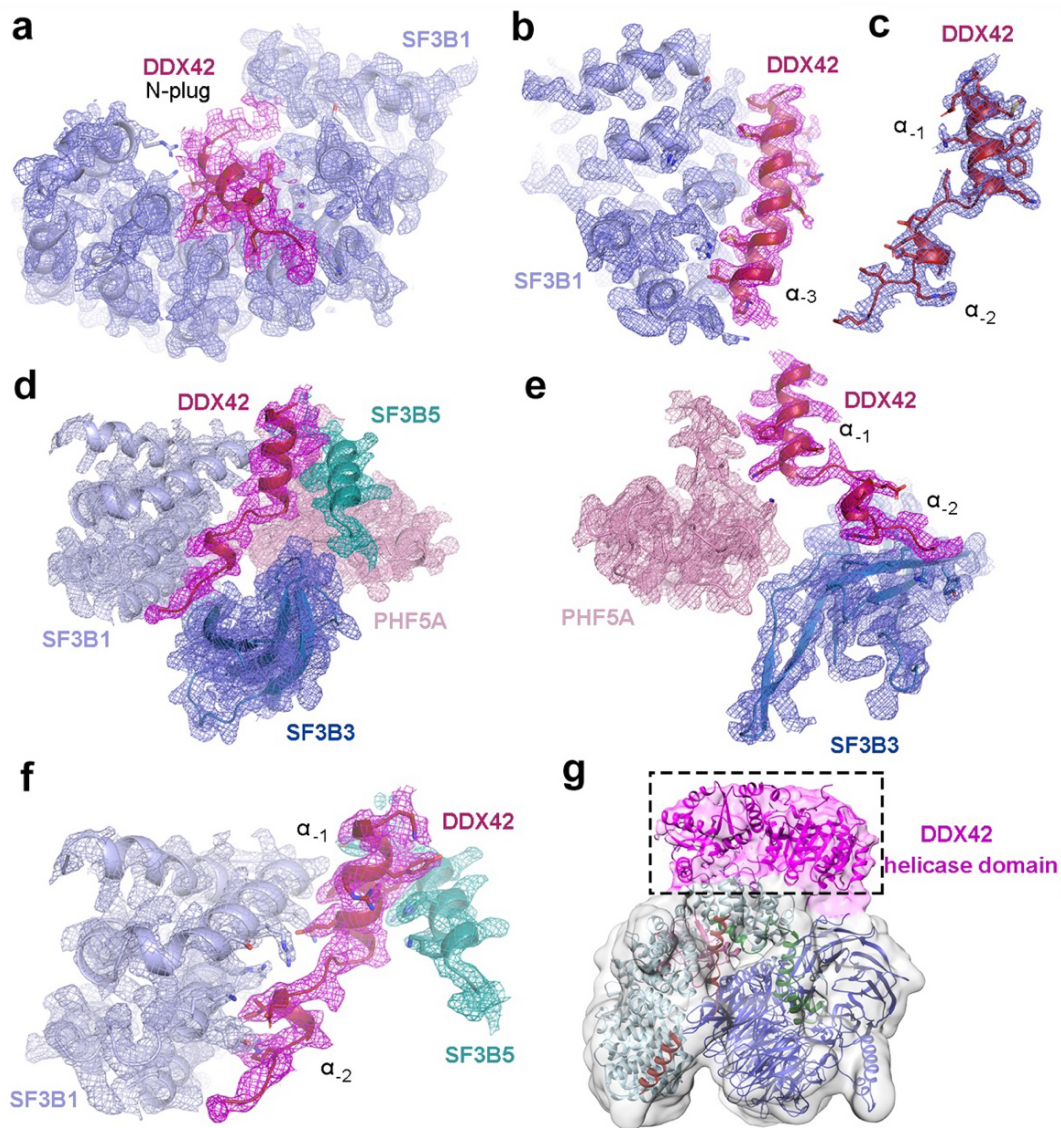

**Supplementary Figure 5. Quality of the EM density map for the interfaces between DDX42 and SF3b complex.** **a**, The EM density map for the N-plug of DDX42 and its surrounding structural elements of SF3B1. **b**, The EM density map for the helix  $\alpha_3$  of DDX42 and its surrounding structural elements of SF3B1. **c**, The EM density map for the two helices  $\alpha_2$  and  $\alpha_1$  of DDX42. **d**, The EM density map for the two helices  $\alpha_2/\alpha_1$  of DDX42 and their surrounding structural elements. **e**, A close-up view on the EM density map of the interface between the helices  $\alpha_2/\alpha_1$  of DDX42 and PHF5A/SF3B3. **f**, A close-up view on the EM density map for the helices  $\alpha_2/\alpha_1$  of DDX42 and SF3B1/SF3B5. **g**, Docking of the DDX42 helicase domain (colored magenta) into the EM density lobe at the periphery of the DDX42-SF3b core complex.

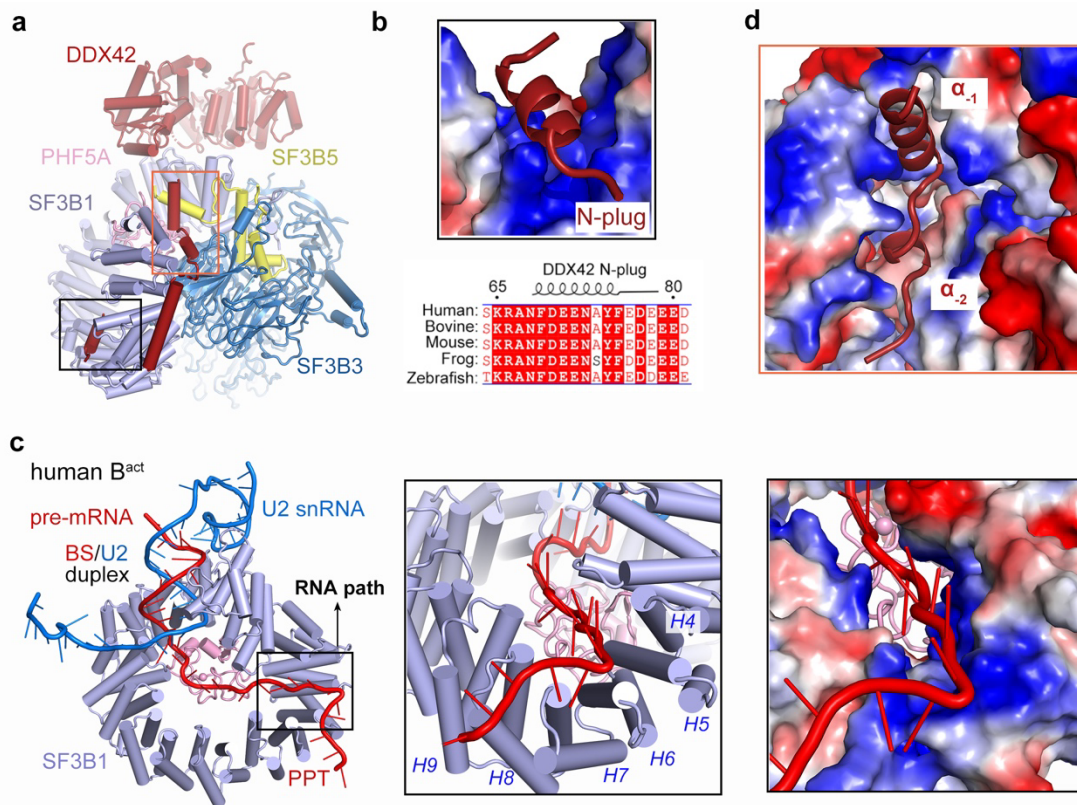

**Supplementary Figure 6. DDX42 is anchored on SF3B1 mainly through its N-terminal motifs, with its N-plug occupying the RNA path of SF3B1.** **a**, An overall view of the structural organization of DDX42 in the SF3b complex. **b**, The N-plug of DDX42 is accommodated in the positively charged RNA path on SF3B1 (upper panel). The N-plug sequences of DDX42 are highly conserved from zebrafish to humans (lower panel). **c**, Conformation of the RNA elements in U2 snRNP of the human B<sup>act</sup> complex (PDB code: 5Z56)<sup>3</sup> (left panel). The pre-mRNA (red) forms the BS/U2 duplex with U2 snRNA. A close-up view on the pre-mRNA element bound to the RNA path of SF3B1 in the human B<sup>act</sup> complex (middle panel). The positively charged surface of the RNA path surrounds the negatively charged polypyrimidine tract (PPT) of pre-mRNA in the human B<sup>act</sup> complex (right panel). **d**, The acidic  $\alpha_1$  and  $\alpha_2$  helices of DDX42 are bound in a positively charged cleft.



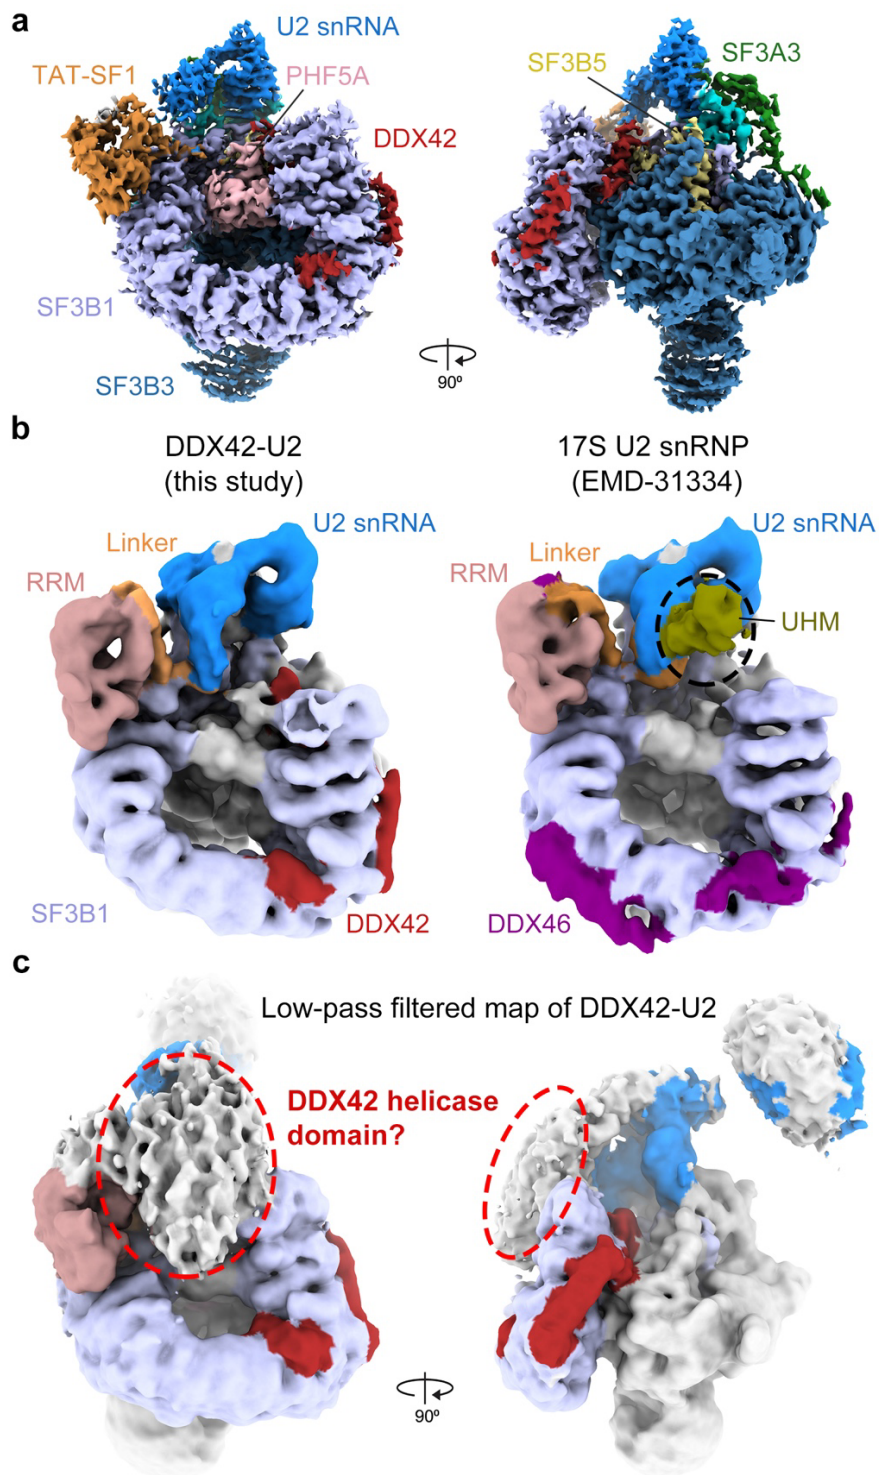

**Supplementary Figure 7. Features of the EM density map for the DDX42-U2 complex.** **a**, The high-resolution EM map for the core region of human DDX42-U2 complex. The N-terminus, but not the helicase domain of DDX42, was identified in DDX42-U2 complex. **b**, Comparison of the low-pass filtered maps for DDX42-U2 complex (this study) and 17S U2 snRNP (EMD-31334)<sup>2</sup>. Notably, there's no obvious density for the UHM domain of TAT-SF1 in DDX42-U2 complex. **c**, An unassigned EM density lobe (circled with dashed lines) is present in the DDX42-U2 complex. It's unclear whether this lobe belongs to the helicase domain of DDX42.



**Supplementary Table 1. Statistics of 3D reconstructions and model refinement**

|                                           | <b>DDX42-SF3b<br/>complex</b> | <b>DDX42-U2<br/>complex</b> |
|-------------------------------------------|-------------------------------|-----------------------------|
| <b>Data collection</b>                    |                               |                             |
| EM equipment                              | FEI Titan Krios               |                             |
| Voltage (kV)                              | 300                           |                             |
| Detector                                  | K3                            |                             |
| Pixel size (Å)                            | 1.087                         |                             |
| Electron dose (e-/Å <sup>2</sup> )        | 50                            |                             |
| Defocus range (μm)                        | 1.5~2.0                       |                             |
| <b>Reconstruction</b>                     |                               |                             |
| Software                                  | RELION 3.0                    | cryoSPARC                   |
| EMDB code                                 | EMD-31330                     | EMD-34841                   |
| Number of particles                       | 234,800                       | 430,443                     |
| Symmetry                                  | C1                            |                             |
| Final masked resolution (Å)               | 2.6                           | 2.7                         |
| Map sharpening B-factor (Å <sup>2</sup> ) | -78.6                         | -108.5                      |
| <b>Model building</b>                     |                               |                             |
| Software                                  | Coot 0.8.9                    |                             |
| Refinement                                | Phenix/Refmac                 |                             |
| PDB code                                  | PDB: 7EVN                     | PDB: 8HK1                   |
| Protein residues                          | 2696                          | 4037                        |
| RNA nucleotides                           | /                             | 148                         |
| <b>Validation</b>                         |                               |                             |
| R.m.s deviations                          |                               |                             |
| Bonds length (Å)                          | 0.01                          | 0.01                        |
| Bonds Angle (°)                           | 0.85                          | 1.72                        |
| Ramachandran plot statistics (%)          |                               |                             |
| Preferred                                 | 95.02                         | 91.01                       |
| Allowed                                   | 4.79                          | 8.38                        |
| Outlier                                   | 0.19                          | 0.61                        |

**Supplementary Table 2. Summary of model building for the DDX42-SF3b complex and DDX42-U2 complex.**

|                           | Molecule              | Length  | Domain/Region             | PDB code | Modeling | Resolution (Å)     | Chain ID |
|---------------------------|-----------------------|---------|---------------------------|----------|----------|--------------------|----------|
| <b>DDX42-SF3b complex</b> | SF3B1                 | 1304    | 490:1304                  | 5YZA     | RD       | 2.5~3.0            | C        |
|                           | SF3B3                 | 1217    | 1:1217                    |          | RD       | 2.5~3.0            | A        |
|                           | SF3B5                 | 86      | 4:81                      |          | RD       | 2.5~3.0            | B        |
|                           | PHF5A                 | 110     | 6:98                      |          | RD       | 2.5~3.0            | D        |
|                           | DDX42                 | 938     | 69:167<br>helicase domain | /        | DM<br>RD | 2.5~3.2<br>5.5~8.0 | E        |
| <b>DDX42-U2 complex</b>   | U2 snRNA              | 188 nt  | 12:73/81:184              | 7EVO     | RD       | 3.5~8.0            | H        |
|                           | SF3B1                 | 1304    | 490:1304                  |          | RD       | 2.5~3.0            | 1        |
|                           | SF3B2                 | 895     | 458:598                   | 7EVO     | RD       | 2.5~3.0            | 2        |
|                           | SF3B3                 | 1217    | 1:1217                    |          | RD       | 2.5~3.0            | 3        |
|                           | SF3B4                 | 424     | 11:181                    |          | RD       | 6.0~10.0           | 4        |
|                           | SF3B5                 | 86      | 16:81                     |          | RD       | 2.5~3.0            | 5        |
|                           | PHF5A                 | 110     | 6:91                      |          | RD       | 2.5~3.0            | 6        |
|                           | SF3A1                 | 793     | 160:282                   | 7EVO     | RD       | 6.0~10.0           | A        |
|                           | SF3A2                 | 464     | 104:209                   |          | RD       | 6.0~10.0           | B        |
|                           | SF3A3                 | 501     | 1:501                     |          | RD       | 6.0~10.0           | C        |
|                           | U2-A'                 | 255     | LRR domain                |          | RD       | 6.0~10.0           | F        |
|                           | U2-B''                | 225     | RRM domain                |          | RD       | 6.0~10.0           | G        |
|                           | SmB,D1,D2<br>D3,E,F,G | -       | Sm fold                   |          | RD       | 6.0~10.0           | a-g      |
|                           | TAT-SF1               | 755     | 127:256                   | /        | DM       | 3.0~4.0            | D        |
| DDX42                     | 938                   | 152:243 | /                         | DM       | 2.5~3.5  | E                  |          |

Under the column labeled “Modeling”, DM stands for *de novo* modeling; RD stands for rigid docking and manual adjustment.

**Supplementary Table 3. Summary of proteins identified in the purified sample of DDX42-U2 complex.**

| <b>Proteins identified</b>                        | <b>M.W. (kDa)</b> | <b>Accession No.</b> | <b>Peptides</b> |
|---------------------------------------------------|-------------------|----------------------|-----------------|
| DDX42-U2 complex proteins                         |                   |                      |                 |
| DDX42                                             | 103               | Q86XP3               | 58              |
| SF3B1                                             | 146               | O75533               | 58              |
| SF3B3                                             | 136               | Q15393               | 52              |
| TAT-SF1                                           | 86                | O43719               | 31              |
| SF3B2                                             | 100               | Q13435               | 26              |
| SF3A3                                             | 59                | Q12874               | 21              |
| SF3A1                                             | 89                | Q15459               | 24              |
| SNRPA1                                            | 28                | P09661               | 19              |
| SF3A2                                             | 49                | Q15428               | 14              |
| SF3B4                                             | 44                | Q15427               | 11              |
| SNRPB2                                            | 26                | P08579               | 9               |
| SNRPD2                                            | 14                | P62316               | 9               |
| SF3B5                                             | 10                | Q9BWJ5               | 8               |
| SF3B6                                             | 15                | Q9Y3B4               | 7               |
| SNRPB                                             | 25                | P14678               | 7               |
| SNRPD3                                            | 14                | P62318               | 5               |
| PHF5A                                             | 12                | Q7RTV0               | 5               |
| SNRPE                                             | 11                | P62304               | 3               |
| SNRPF                                             | 10                | P62306               | 3               |
| Ribosomal proteins, chaperons, and other proteins |                   |                      |                 |
| EIF3A                                             | 166               | Q14152               | 40              |
| HSPA1B                                            | 70                | A0A0G2JIW1           | 35              |
| EFTUD2                                            | 109               | Q15029               | 29              |
| EIF3C                                             | 105               | Q99613               | 24              |
| HSPA8                                             | 71                | P11142               | 19              |
| EIF3B                                             | 92                | P55884               | 18              |
| HSP90AB1                                          | 83                | P08238               | 16              |
| BOP1                                              | 84                | Q14137               | 10              |
| LAS1L                                             | 83                | Q9Y4W2               | 7               |
| WDR12                                             | 50                | Q9GZL7               | 5               |
| MRPS22                                            | 41                | P82650               | 4               |
| RPL18                                             | 19                | H0YHA7               | 3               |
| RPL22                                             | 15                | P35268               | 3               |



**Supplementary Table 4. Summary of key residues in SF3B1 that interact with DDX42 and DDX46.**

|                        | SF3B1 residues | DDX42-interacting | DDX46-interacting | Cancer-derived mutation |
|------------------------|----------------|-------------------|-------------------|-------------------------|
| SF3B1 H10-H12          | W938           |                   | E157              |                         |
|                        | N931           |                   | R163              |                         |
|                        | E902           |                   | K164              | ✓                       |
|                        | Y898           |                   | R171              | ✓                       |
|                        | D894           |                   | R163, R166        | ✓                       |
|                        | E860           |                   | R171              |                         |
| SF3B1 RNA path (H4-H9) | R828           | E71               |                   |                         |
|                        | E783           |                   | L200              | ✓                       |
|                        | D781           |                   | K196, W198        | ✓                       |
|                        | K748           | E72               | E201              |                         |
|                        | K741           | Y75, D78          | S199, D202, D240  | ✓                       |
|                        | K700           | E79, E80          | D203              | ✓                       |
|                        | Q699           | E79               | D205              | ✓                       |
|                        | K666           | E77               | D203              | ✓                       |
|                        | H662           | E77               | D203              | ✓                       |
|                        | R625           | E80               | D203              | ✓                       |
| SF3B1 H3-H5            | K656           | D114, E117        | D226, D229        |                         |
|                        | V651           | L116              | L228              |                         |
|                        | F647           | F119              | Y231              |                         |
|                        | I610           | V123              | V235              |                         |
|                        | R568           | D130              |                   |                         |
| SF3B1 H1-H2            | R562           | E152              |                   |                         |
|                        | R558           | I151              |                   |                         |
|                        | D557           | R148              |                   |                         |
|                        | R517           | D155, E158        |                   |                         |
|                        | K513           | D155              |                   |                         |
|                        | P510           | F161              |                   |                         |

Residues from DDX42 and DDX46 that interact with SF3B1 are indicated in red and purple, respectively. Residues of SF3B1 that are frequently mutated in cancers are indicated.

## Supplementary References

- 1 Dilorio, M. C. & Kulczyk, A. W. A Robust Single-Particle Cryo-Electron Microscopy (cryo-EM) Processing Workflow with cryoSPARC, RELION, and Scipion. *J Vis Exp*, doi:10.3791/63387 (2022).
- 2 Zhang, X. Z., X.; Bian, T.; Yang, F.; Li, P.; Lu, Y.; Xing, Z.; Zhang, Q.; Shi, Y. Structural Insights into Branch Site Proofreading by Human Spliceosome. *bioRxiv*, doi:<https://doi.org/10.1101/2022.11.07.515429> (2022).
- 3 Zhang, X. *et al.* Structure of the human activated spliceosome in three conformational states. *Cell Res* **28**, 307-322, doi:10.1038/cr.2018.14 (2018).
